# Supplementary material for: Pathologic Inflammation in Malnutrition Is Driven by Proinflammatory Intestinal Microbiota, Large Intestine Barrier Dysfunction, and Translocation of Bacterial Lipopolysaccharide
Source: PubMed Central journal article supplement (PMC9204284; doi:10.3389/fimmu.2022.846155), 2022-05-26
Supplement: Table_1.pdf [file Table_1.pdf]

**Supplementary Table 1** qRT-PCR primers used in this study

| Target       | Primer                               | Sequence (5'-3')                                     |
|--------------|--------------------------------------|------------------------------------------------------|
| <i>18S</i>   | 18S For<br>18S Rev                   | TTAGAGTGTTCAAAGCAGGCCCGA<br>TCTTGGCAAATGCTTTCGCTCTGG |
| <i>Ccl2</i>  | CCL2 For<br>CCL2 Rev                 | GCTCAGCCAGATGCAGTTAACGC<br>TGGGGTCAGCACAGACCTCTCT    |
| <i>Cxcl1</i> | CXCL1 For<br>CXCL1 Rev               | ATCCAGAGCTTGAAGGTGTTG<br>GTCTGTCTTCTTTCTCCGTTACTT    |
| <i>Cxcl2</i> | CXCL2 For<br>CXCL2 Rev               | CCAGACAGAAGTCATAGCCACT<br>GGTTCTTCCGTTGAGGGACA       |
| <i>Il1b</i>  | IL1B For<br>IL1B Rev                 | TTGACGGACCCCAAAGATG<br>AGAAGGTGCTCATGTCCTCAT         |
| <i>Il17a</i> | IL17A For<br>IL17A Rev               | ACCAGCTGATCAGGACGCGC<br>CCAGGCTCAGCAGCAGCAACA        |
| <i>Il6</i>   | IL-6 For<br>IL-6 Rev                 | AGACAAAGCCAGAGTCCTTCAGAGA<br>GCCACTCCTTCTGTGACTCCAGC |
| <i>Tnf</i>   | TNF For<br>TNF Rev                   | AGCCGATGGGTTGTACCTTGTCTA<br>TGAGATAGCAAATCGGCTGACGGT |
| <i>Nos2</i>  | NOS2 For<br>NOS2 Rev                 | TGGCTCGCTTTGCCACGGAC<br>GCTGCGACAGCAGGAAGCCA         |
| <i>Mpo</i>   | MPO For<br>MPO Rev                   | CAGCGAGGACCCCCTAGCCA<br>GGCATCTCGCTGGAGCGCAT         |
| <i>Ifng</i>  | IFN $\gamma$ For<br>IFN $\gamma$ Rev | GCAACAGCAAGGCGAAAAAGGA<br>TGAATGCTTGGCGCTGGACCTG     |
